# Supplementary material for: Metabolization and degradation kinetics of the urban-use pesticide fipronil by white rot fungus Trametes versicolor
Source: Royal Society of Chemistry journal article supplement (doi:10.1039/c6em00344c), 2016-01-01
Supplement: c6em00344c1.pdf [file c6em00344c1.pdf]

Supporting Information for

Metabolization and Degradation Kinetics of the  
Urban-use Pesticide Fipronil by White Rot Fungus  
*Trametes versicolor*

Jordyn M. Wolfand<sup>1,2</sup>, Gregory H. LeFevre<sup>1,2,3</sup>, and Richard G. Luthy<sup>1,2\*</sup>

<sup>1</sup>ReNUWIt Engineering Research Center; <sup>2</sup>Department of Civil & Environmental Engineering, Stanford University, Stanford, CA, United States; <sup>3</sup>Department of Civil & Environmental Engineering, University of Iowa, Iowa City, IA, United States

## Contents

|                                                                            |   |
|----------------------------------------------------------------------------|---|
| <b>I. Supporting Method Details</b> .....                                  | 3 |
| <b>A. LC/MS MRM Parameters</b> .....                                       | 3 |
| <b>B. Metabolomics Method Details: XCMS and R Code</b> .....               | 3 |
| <b>C. Purity of purchased standards</b> .....                              | 4 |
| <b>II. Supplementary Results</b> .....                                     | 4 |
| <b>A. Fipronil metabolite data with full MS/MS fragment ion data</b> ..... | 5 |
| <b>B. Visual representation of MS/MS fragment analysis</b> .....           | 6 |
| <b>C. Statistics for comparison tests</b> .....                            | 8 |

## I. Supporting Method Details

### A. LC/MS MRM Parameters

**Table S.1.** LC-MS parameters for fipronil and fipronil metabolites

| MRM Mass Transition   | Q1 Mass (Da) | Q3 Mass (Da) | Declustering Potential (V) | Focusing Potential (V) | Entrance Potential (V) | Collision Energy (V) | Collision Cell Exit Potential (V) |
|-----------------------|--------------|--------------|----------------------------|------------------------|------------------------|----------------------|-----------------------------------|
| Fipronil-1            | 434.971      | 330.000      | -66                        | -270                   | -10                    | -24                  | -11                               |
| Fipronil-2            | 434.971      | 250.000      | -66                        | -270                   | -10                    | -36                  | -13                               |
| Fipronil Sulfone-1    | 450.898      | 415.000      | -81                        | -250                   | -10                    | -24                  | -15                               |
| Fipronil Sulfone-2    | 450.898      | 282.000      | -81                        | -250                   | -10                    | -40                  | -19                               |
| Fipronil desulfinyl-1 | 387.947      | 282.978      | -91                        | -280                   | -10                    | -42                  | -5                                |
| Fipronil desulfinyl-2 | 387.947      | 325.962      | -91                        | -280                   | -10                    | -42                  | -9                                |
| M468-1                | 466.921      | 430.933      | -30                        | -200                   | -10                    | -30                  | -15                               |
| M468-2                | 466.921      | 132.957      | -30                        | -200                   | -10                    | -30                  | -15                               |
| M600-1                | 598.963      | 281.994      | -30                        | -200                   | -10                    | -30                  | -15                               |
| M600-2                | 598.963      | 316.958      | -30                        | -200                   | -10                    | -30                  | -15                               |
| M600-3                | 598.963      | 430.943      | -30                        | -200                   | -10                    | -30                  | -15                               |
| M600-4                | 598.963      | 449.918      | -30                        | -200                   | -10                    | -30                  | -15                               |
| M600-5                | 598.963      | 414.951      | -30                        | -200                   | -10                    | -30                  | -15                               |

### B. Metabolomics Method Details: XCMS and R Code

Agilent MassHunter data files were converted to mzXML format using Trapper (Seattle Proteome Center). mzXML files were analyzed by XCMS; procedural details are provided in the relevant references.<sup>1</sup> Further data processing of the resultant comparisons was described in the manuscript body in the Methods section. A sample R code for a comparison between treatment and control groups is as follows:

```
library(xcms)
xset<-xcmsSet()
xset<-group(xset)
xset2<-retcor(xset, family="s", plottype="m")
xset2<-group(xset2)
xset3<-retcor(xset2, family="s", plottype="m")
xset3<-group(xset3)
xset4<-retcor(xset3, family="s", plottype="m")
xset4<-group(xset4, bw=10)
xset5<-fillPeaks(xset4)
reporttab<-
diffreport(xset5, "Treatment", "Control", "Treatment_vs_Control", 500)
```

### C. Purity of purchased standards

**Table S.2. Purity of purchased standards. All standards were PESTANAL® analytical standards purchased from Sigma-Aldrich.**

| Standard            | CAS #       | Purity (%) |
|---------------------|-------------|------------|
| Fipronil            | 120068-37-3 | 99.6       |
| Fipronil sulfone    | 120068-36-2 | 99.9       |
| Fipronil desulfinyl | 205650-65-3 | > 94       |
| Fipronil sulfide    | 120067-83-6 | 99.5       |

## II. Supplementary Results

### A. Fipronil metabolite data with full MS/MS fragment ion data

**Table S.3.** Fipronil and metabolite data with full MS/MS fragment ion data. This table supplements Table 1 in the manuscript body.

| Fipronil fungi metabolites            |                                                                                    |                                                                                                |                                              |                            |                     | Fragment ions      |                     |                                                                                 |     |
|---------------------------------------|------------------------------------------------------------------------------------|------------------------------------------------------------------------------------------------|----------------------------------------------|----------------------------|---------------------|--------------------|---------------------|---------------------------------------------------------------------------------|-----|
| Metabolite                            | Proposed Structure                                                                 | Proposed Formula                                                                               | Confidence Level*                            | Retention Time (min)       | Accurate Mass (m/z) | Nominal mass (m/z) | Accurate mass (m/z) | Proposed molecular formula                                                      |     |
| Fipronil                              | 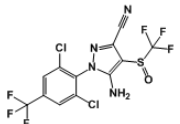  | C <sub>12</sub> H <sub>4</sub> Cl <sub>2</sub> F <sub>6</sub> N <sub>4</sub> O <sub>S</sub>    | Parent compound                              | 14.3                       | 434.93143           | 399                | 398.95              | C <sub>12</sub> H <sub>2</sub> ClF <sub>6</sub> N <sub>4</sub> O <sub>S</sub>   |     |
|                                       |                                                                                    |                                                                                                |                                              |                            |                     | 330                | 329.95              | C <sub>11</sub> H <sub>2</sub> ClF <sub>3</sub> N <sub>4</sub> O <sub>S</sub>   |     |
|                                       |                                                                                    |                                                                                                |                                              |                            |                     | 250                | 249.959             | C <sub>10</sub> H <sub>4</sub> Cl <sub>2</sub> N <sub>4</sub>                   |     |
| Fipronil sulfone                      |   | C <sub>12</sub> H <sub>4</sub> Cl <sub>2</sub> F <sub>6</sub> N <sub>4</sub> O <sub>2</sub> S  | Level 1; Standard confirmation, HR-MS, MS-MS | 15.9                       | 450.92691           | 431                | 430.9393            | C <sub>12</sub> H <sub>2</sub> ClF <sub>6</sub> N <sub>4</sub> O <sub>3</sub> S |     |
|                                       |                                                                                    |                                                                                                |                                              |                            |                     | 282                | 281.9963            | C <sub>11</sub> H <sub>2</sub> ClF <sub>3</sub> N <sub>4</sub>                  |     |
|                                       |                                                                                    |                                                                                                |                                              |                            |                     | 415                | 414.9403            | C <sub>12</sub> H <sub>2</sub> ClF <sub>6</sub> N <sub>4</sub> O <sub>2</sub> S |     |
|                                       |                                                                                    |                                                                                                |                                              |                            |                     | 244                | 243.989             | C <sub>10</sub> H <sub>4</sub> N <sub>4</sub> O <sub>2</sub> S                  |     |
|                                       |                                                                                    |                                                                                                |                                              |                            |                     | 133                | 132.9578            | CF <sub>3</sub> O <sub>2</sub> S                                                |     |
| M468<br>Hydroxylated fipronil sulfone |   | C <sub>12</sub> H <sub>4</sub> Cl <sub>2</sub> F <sub>6</sub> N <sub>4</sub> O <sub>3</sub> S  | Level 3; HR-MS, MS/MS                        | 14.9                       | 466.92136           | 415                | 414.9403            | C <sub>12</sub> H <sub>2</sub> ClF <sub>6</sub> N <sub>4</sub> O <sub>2</sub> S |     |
|                                       |                                                                                    |                                                                                                |                                              |                            |                     | 173                | 172.9529            | C <sub>7</sub> H <sub>3</sub> Cl <sub>2</sub> O                                 |     |
|                                       |                                                                                    |                                                                                                |                                              |                            |                     | 133                | 132.9578            | CF <sub>3</sub> O <sub>2</sub> S                                                |     |
|                                       |                                                                                    |                                                                                                |                                              |                            |                     | 220                | 219.9903            | C <sub>5</sub> H <sub>2</sub> F <sub>2</sub> N <sub>4</sub> O <sub>2</sub> S    |     |
|                                       |                                                                                    |                                                                                                |                                              |                            |                     | 431                | 430.9393            | C <sub>12</sub> H <sub>2</sub> ClF <sub>6</sub> N <sub>4</sub> O <sub>3</sub> S |     |
| M600<br>Glycosylated fipronil sulfone |  | C <sub>17</sub> H <sub>12</sub> Cl <sub>2</sub> F <sub>6</sub> N <sub>4</sub> O <sub>7</sub> S | Level 3; HR-MS, MS/MS                        | 12.1                       | 598.96256           | 415                | 414.9403            | C <sub>12</sub> H <sub>2</sub> ClF <sub>6</sub> N <sub>4</sub> O <sub>2</sub> S |     |
|                                       |                                                                                    |                                                                                                |                                              |                            |                     | 431                | 430.9393            | C <sub>12</sub> H <sub>2</sub> ClF <sub>6</sub> N <sub>4</sub> O <sub>3</sub> S |     |
|                                       |                                                                                    |                                                                                                |                                              |                            |                     | 213                | 212.949             | C <sub>7</sub> H <sub>2</sub> Cl <sub>2</sub> F <sub>3</sub>                    |     |
|                                       |                                                                                    |                                                                                                |                                              |                            |                     | 220                | 219.9903            | C <sub>5</sub> H <sub>2</sub> F <sub>2</sub> N <sub>4</sub> O <sub>2</sub> S    |     |
|                                       |                                                                                    |                                                                                                |                                              |                            |                     | 282                | 281.994             | C <sub>11</sub> H <sub>2</sub> ClF <sub>3</sub> N <sub>4</sub>                  |     |
| M584                                  | Unknown                                                                            | Unknown                                                                                        | Ambiguous                                    | Level 5; HR-MS, exact mass | 19.3                | 582.87523          | Unknown             | n/a                                                                             | n/a |
| M770                                  | Unknown                                                                            | Unknown                                                                                        | Ambiguous                                    | Level 5; HR-MS, exact mass | 22.0                | 768.87632          | Unknown             | n/a                                                                             | n/a |

**B. Visual representation of MS/MS fragment analysis**

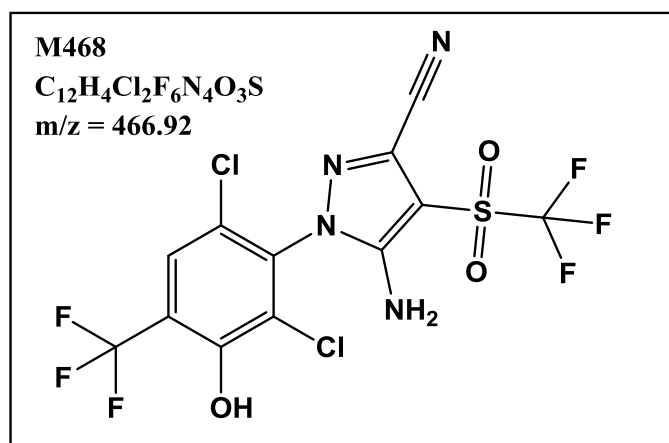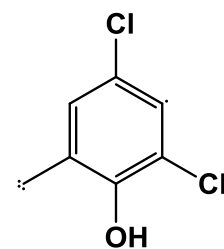

**Chemical Formula:  $C_7H_3Cl_2O^3\cdot$**   
**Exact Mass: 172.96**

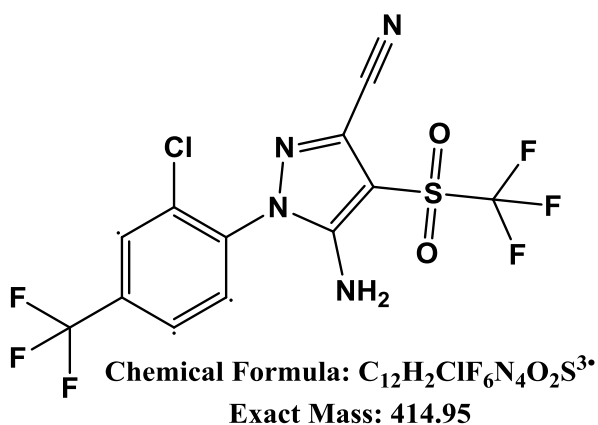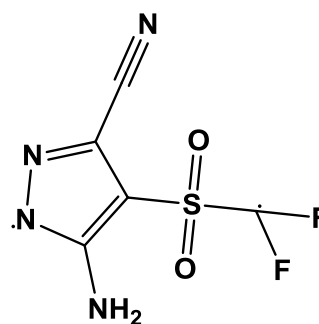

**Chemical Formula:  $C_5H_2F_2N_4O_2S^2\cdot$**   
**Exact Mass: 219.99**

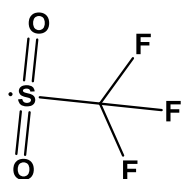

**Chemical Formula:  $CF_3O_2S^{\cdot}$**   
**Exact Mass: 132.96**

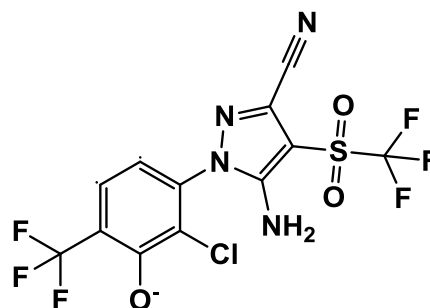

**Chemical Formula:  $C_{12}H_2ClF_6N_4O_3S^2\cdot$**   
**Exact Mass: 430.94**

**M600**

**C<sub>17</sub>H<sub>12</sub>Cl<sub>2</sub>F<sub>6</sub>N<sub>4</sub>O<sub>7</sub>S**

**m/z = 598.96**

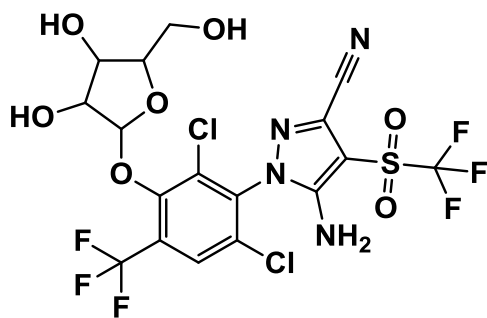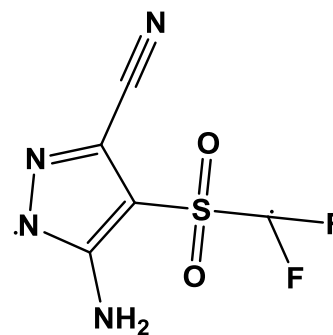

**Chemical Formula: C<sub>5</sub>H<sub>2</sub>F<sub>2</sub>N<sub>4</sub>O<sub>2</sub>S<sup>•</sup>**

**Exact Mass: 219.99**

**Chemical Formula: C<sub>12</sub>H<sub>2</sub>ClF<sub>6</sub>N<sub>4</sub>O<sub>2</sub>S<sup>3•</sup>**

**Exact Mass: 414.95**

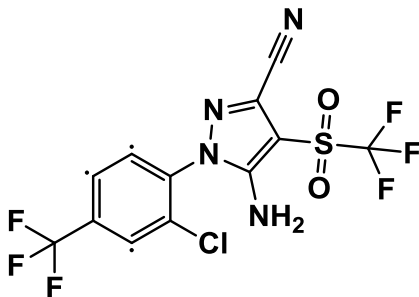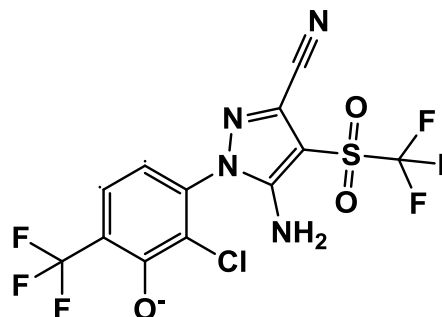

**Chemical Formula: C<sub>12</sub>H<sub>2</sub>ClF<sub>6</sub>N<sub>4</sub>O<sub>3</sub>S<sup>2•</sup>**

**Exact Mass: 430.94**

**Chemical Formula: C<sub>11</sub>H<sub>2</sub>ClF<sub>3</sub>N<sub>4</sub><sup>4•</sup>**

**Exact Mass: 281.99**

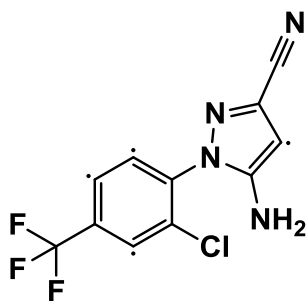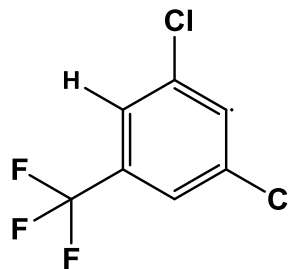

**Chemical Formula: C<sub>7</sub>H<sub>2</sub>Cl<sub>2</sub>F<sub>3</sub><sup>•</sup>**

**Exact Mass: 212.95**

### C. Statistics for comparison tests

**Table S.4.** Results of Tukey comparison for all treatment groups and measured fipronil derivatives. The alpha for the post-test was set at 0.05 to generate the reported adjusted p-values.

| <b>log (concentration fipronil [µg/L])</b>      | <b>Mean Diff.</b> | <b>95% CI of diff.</b> | <b>Significant?</b> | <b>Adjusted P Value</b> |
|-------------------------------------------------|-------------------|------------------------|---------------------|-------------------------|
| Treatment vs. Negative control                  | -0.58             | -1.1 to -0.078         | Yes                 | 0.0199                  |
| Enzyme-inhibited treatment vs. Negative control | -0.053            | -0.55 to 0.44          | No                  | 0.9903                  |
| Sorption control vs. Negative control           | -0.14             | -0.63 to 0.36          | No                  | 0.8688                  |
| Enzyme-inhibited treatment vs. Treatment        | 0.52              | 0.024 to 1.0           | Yes                 | 0.0377                  |
| Sorption control vs. Treatment                  | 0.44              | -0.058 to 0.94         | No                  | 0.0958                  |
| Sorption control vs. Enzyme-inhibited treatment | -0.083            | -0.58 to 0.41          | No                  | 0.9658                  |

| <b>log (concentration fipronil sulfone [µg/L])</b> | <b>Mean Diff.</b> | <b>95% CI of diff.</b> | <b>Significant?</b> | <b>Adjusted P Value</b> |
|----------------------------------------------------|-------------------|------------------------|---------------------|-------------------------|
| Treatment vs. Negative Control                     | 1.5               | 0.55 to 2.5            | Yes                 | 0.0015                  |
| Enzyme-inhibited treatment vs. Negative Control    | 0.94              | -0.040 to 1.9          | No                  | 0.0629                  |
| Sorption control vs. Negative Control              | 0.80              | -0.18 to 1.8           | No                  | 0.1368                  |
| Enzyme-inhibited treatment vs. Treatment           | -0.59             | -1.6 to 0.39           | No                  | 0.3547                  |
| Sorption control vs. Treatment                     | -0.74             | -1.7 to 0.25           | No                  | 0.1883                  |
| Sorption control vs. Enzyme-inhibited treatment    | -0.14             | -1.1 to 0.84           | No                  | 0.9767                  |

| <b>log (peak area of M468)</b>                  | <b>Mean Diff.</b> | <b>95% CI of diff.</b> | <b>Significant?</b> | <b>Adjusted P Value</b> |
|-------------------------------------------------|-------------------|------------------------|---------------------|-------------------------|
| Treatment vs. Negative Control                  | 1.4               | 0.46 to 2.4            | Yes                 | 0.0027                  |
| Enzyme-inhibited treatment vs. Negative Control | 0.048             | -0.91 to 1.0           | No                  | 0.999                   |
| Sorption control vs. Negative Control           | 0.033             | -0.93 to 1.0           | No                  | 0.9997                  |
| Enzyme-inhibited treatment vs. Treatment        | -1.4              | -2.3 to -0.41          | Yes                 | 0.0037                  |
| Sorption control vs. Treatment                  | -1.4              | -2.4 to -0.43          | Yes                 | 0.0033                  |
| Sorption control vs. Enzyme-inhibited treatment | -0.015            | -0.98 to 0.95          | No                  | > 0.9999                |

| <b>log (peak area of M600)</b>                  | <b>Mean Diff.</b> | <b>95% CI of diff.</b> | <b>Significant?</b> | <b>Adjusted P Value</b> |
|-------------------------------------------------|-------------------|------------------------|---------------------|-------------------------|
| Treatment vs. Negative Control                  | 0.83              | 0.21 to 1.5            | Yes                 | 0.0063                  |
| Enzyme-inhibited treatment vs. Negative Control | -0.099            | -0.72 to 0.52          | No                  | 0.9697                  |
| Sorption control vs. Negative Control           | -0.061            | -0.68 to 0.56          | No                  | 0.9926                  |
| Enzyme-inhibited treatment vs. Treatment        | -0.93             | -1.5 to -0.31          | Yes                 | 0.0023                  |
| Sorption control vs. Treatment                  | -0.89             | -1.5 to -0.27          | Yes                 | 0.0034                  |
| Sorption control vs. Enzyme-inhibited treatment | 0.038             | -0.58 to 0.66          | No                  | 0.9981                  |

| <b>Biomass (mg)</b>                             | <b>Mean Diff.</b> | <b>95% CI of diff.</b> | <b>Significant?</b> | <b>Adjusted P Value</b> |
|-------------------------------------------------|-------------------|------------------------|---------------------|-------------------------|
| Enzyme-inhibited treatment vs. Treatment        | -0.80             | -4.6 to 3.0            | No                  | 0.8446                  |
| Sorption control vs. Treatment                  | -2.05             | -5.9 to 1.8            | No                  | 0.3568                  |
| Sorption control vs. Enzyme-inhibited treatment | -1.3              | -5.1 to 2.6            | No                  | 0.6664                  |
